# Supplementary material for: The incretin hormone GIP is upregulated in patients with atherosclerosis and stabilizes plaques in ApoE−/− mice by blocking monocyte/macrophage activation
Source: PubMed Central journal article supplement — Mol Metab. 2018 May 23;14:150–7. doi: 10.1016/j.molmet.2018.05.014 (PMC6034034; doi:10.1016/j.molmet.2018.05.014), 2018-05-23
Supplement: mmc1.pdf [file mmc1.pdf]

**Supplemental Table** Univariate Analysis: Mixed model for logarithmically transformed GIP-serum values

|                     | <b>p-value</b> |
|---------------------|----------------|
| <i>CAD</i>          | 0.1869         |
| <i>PAD</i>          | <b>0.0165</b>  |
| <i>Age</i>          | 0.4759         |
| <i>BMI</i>          | 0.3390         |
| <i>Sex</i>          | 0.2497         |
| <i>Hypertension</i> | 0.6543         |
| <i>DM</i>           | 0.0530         |
| <i>CRP</i>          | 0.8391         |
| <i>WBC</i>          | 0.7430         |
| <i>Smoker</i>       | 0.5066         |
