# Supplementary material for: The incretin hormone GIP is upregulated in patients with atherosclerosis and stabilizes plaques in ApoE−/− mice by blocking monocyte/macrophage activation
Source: PubMed Central journal article supplement — Mol Metab. 2018 May 23;14:150–7. doi: 10.1016/j.molmet.2018.05.014 (PMC6034034; doi:10.1016/j.molmet.2018.05.014), 2018-05-23
Supplement: mmc3.pdf [file mmc3.pdf]

Figure S1

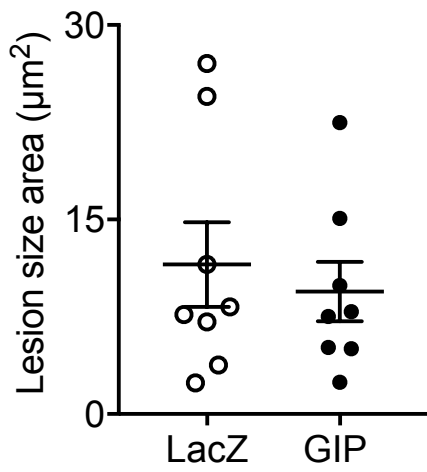

**Figure S1:** Quantification of atherosclerotic lesion size in the aortic arch in C57BL6 ApoE<sup>-/-</sup> mice after viral overexpression of GIP (1-42) visualized by H&E staining (n = 8). Results are expressed as the mean ± SEM.

Figure S2

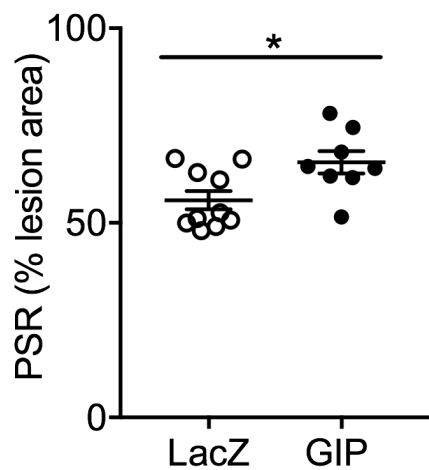

**Figure S2:** Quantification of plaque collagen content in the aortic root in C57BL6 ApoE<sup>-/-</sup> mice after viral overexpression of GIP (1-42) visualized by picosirius red staining (n = 8-10). Results are expressed as the mean ± SEM. \*p < 0.05 vs. LacZ

Figure S3

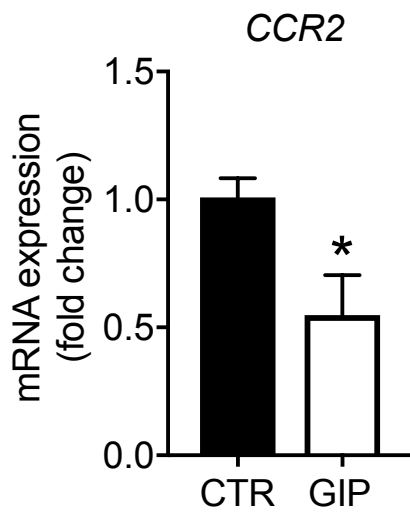

**Figure S3:** CCR2 mRNA expression by qPCR analysis in THP-1 monocytes 12h after stimulation with GIP (10 nM) (n = 4). Results are expressed as the mean  $\pm$  SEM. \* $p < 0.05$  vs. CTR

Figure S4

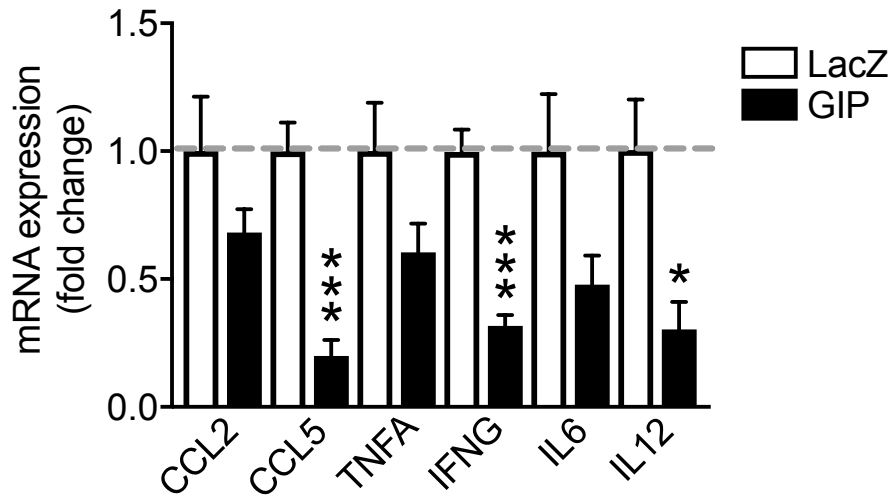

**Figure S4:** Liver mRNA expression profile after qPCR analysis at 12 weeks on western diet in ApoE<sup>-/-</sup> mice (n = 4-9). Results are expressed as the mean  $\pm$  SEM. \*p < 0.05; \*\*\*p < 0.001 vs. LacZ
